# Supplementary material
Source: PubMed Central journal article supplement (PMC4677570)
Supplement: Supp_Figure1.pdf [file Supp_Figure1.pdf]

## Supplementary Data

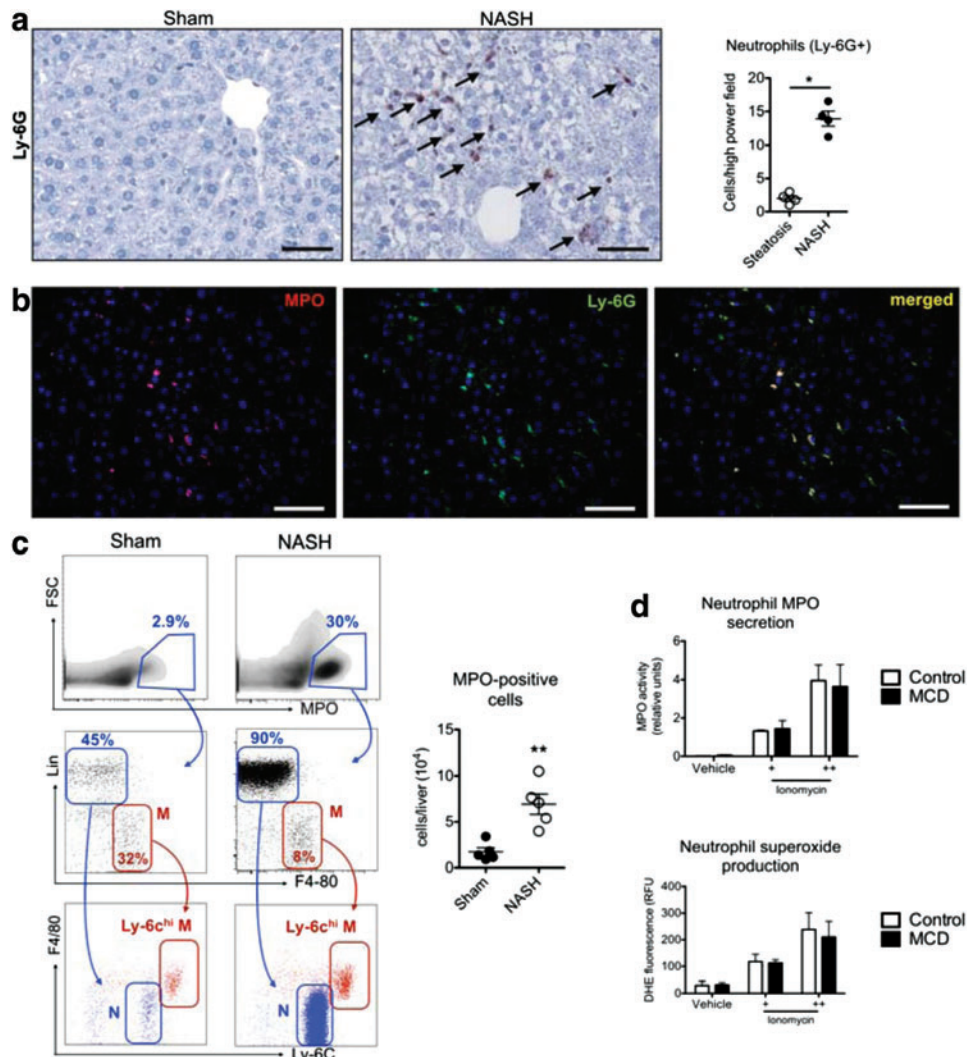

**SUPPLEMENTARY FIG. S1.** (a) Immunohistochemistry of Ly-6G-positive neutrophils in nonalcoholic steatohepatitis (NASH) versus sham ( $n=4$  per group) arrows indicate Ly-6G positive cells). Bar = 50  $\mu\text{m}$ . (b) Immunofluorescence microscopy in NASH for myeloperoxidase (MPO) (red) and neutrophils (Ly-6G, green). Bar = 50  $\mu\text{m}$ . Blue = DAPI. (c) Flow cytometric analysis of MPO-expressing cells (N = neutrophils, M = monocytes,  $n=4-5$  per group). (d) MPO secretion and superoxide anion generation of neutrophils isolated from mice fed methionine and choline-deficient (MCD) diet versus control diet and stimulated with ionomycin ( $n=3$  per group) All data are mean  $\pm$  SEM. Lin = CD90/CD49.2/B220/NK1.1/Ly-6G. \* $p < 0.05$ , \*\* $p < 0.01$ . + 500 ng/ml ionomycin. ++ 2000 ng/ml ionomycin.
