# Supplementary material
Source: PubMed Central journal article supplement (PMC4677570)
Supplement: Supp_Figure2.pdf [file Supp_Figure2.pdf]

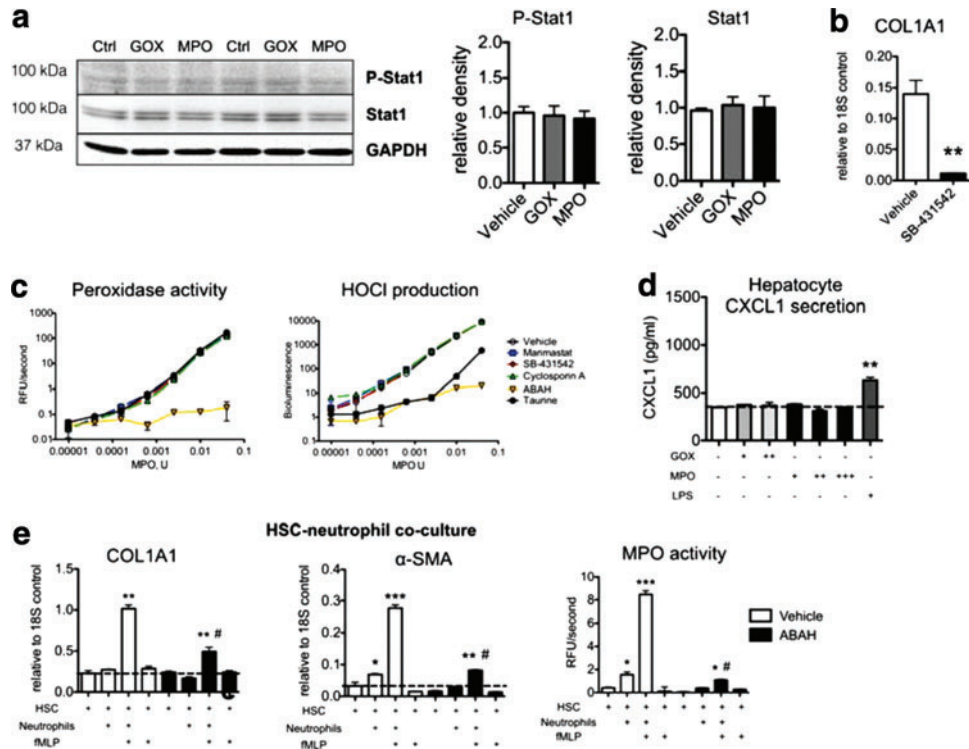

**SUPPLEMENTARY FIG. S2.** (a) Western blots of phosphorylated and unphosphorylated STAT1 of hepatocytes stimulated with MPO and/or glucose oxidase (GOX) ( $n=4$  per group). (b) Expression of COL1A1 in primary hepatic stellate cells cultured for 5 days in the presence of SB-431542 or vehicle ( $n=4$  per group). (c) Interaction of various inhibitors with purified MPO enzyme. MPO was incubated with 10 nM marimastat, 100 nM SB-431542, 500  $\mu$ M taurine, 20  $\mu$ M ABAH, 1  $\mu$ M cyclosporin A, or 1 tab/10 ml protease inhibitor cocktail. Peroxidase enzyme activity (*left panel*) was measured with 10-acetyl-3,7-dihydroxyphenoxazine (ADHP) and HOCl production (*right panel*) with luminol. (d) CXCL1 protein secretion in hepatocytes stimulated with GOX, MPO, and LPS ( $n=3$  per group). (e)  $\alpha$ -SMA and COL1A1 expression in HSCs cocultured with neutrophils, and MPO activity in supernatant with (*black bars*) or without (*white bars*) the MPO inhibitor, ABAH ( $n=3-4$  per group). All data are mean  $\pm$  SEM. + = 0.05 U/ml, ++ = 0.5 U/ml, \* $p < 0.05$ , \*\* $p < 0.01$ , \*\*\* $p < 0.001$ , and # $p < 0.05$  comparing inhibitors with vehicle.
