# Supplementary material
Source: PubMed Central journal article supplement (PMC4677570)
Supplement: Supp_Table1.pdf [file Supp_Table1.pdf]

SUPPLEMENTARY TABLE S1. DIET COMPOSITION

| <i>Formula</i>        | <i>MCD diet</i> | <i>Control diet</i> |
|-----------------------|-----------------|---------------------|
| Protein,% kcal        | 14.6            | 25.9                |
| Carbohydrates,% kcal  | 63.2            | 60.0                |
| Fat,% kcal            | 22.1            | 14.0                |
| Gross energy, kcal/gm | 4.1             | 4.1                 |
| Starch, g/kg          | 200             | 321                 |
| Sucrose, g/kg         | 455             | 98                  |
| Corn oil, g/kg        | 100             | 66                  |
| Cellulose, g/kg       | 30              | 52                  |
| Choline, g/kg         | 0.0             | 0.2                 |
| L-Methionine, g/kg    | 0.0             | 5.8                 |
| L-Alanine, g/kg       | 3.5             | 11.6                |
| L-Arginine, g/kg      | 12.1            | 14.0                |
| L-Aspartic Acid, g/kg | 3.5             | 23.3                |
| L-Cysteine, g/kg      | 3.5             | 4.0                 |
| L-Glutamic Acid, g/kg | 40.0            | 53.0                |
| Glycine, g/kg         | 23.3            | 11.0                |
| L-Histidine, g/kg     | 4.5             | 5.5                 |
| L-Isoleucine, g/kg    | 8.2             | 8.9                 |
| L-Leucine, g/kg       | 11.1            | 16.5                |
| L-Lysine, g/kg        | 18.0            | 12.9                |
| L-Phenylalanine, g/kg | 7.5             | 10.0                |
| L-Proline, g/kg       | 3.5             | 17.2                |
| L-Serine, g/kg        | 3.5             | 11.9                |
| L-Threonine, g/kg     | 8.2             | 8.3                 |
| L-Tryptophan, g/kg    | 1.8             | 3.0                 |
| L-Tyrosine, g/kg      | 5.0             | 6.0                 |
| L-Valine, g/kg        | 8.2             | 11.2                |
