# Supplementary material
Source: PubMed Central journal article supplement (PMC4677570)
Supplement: Supp_Table2.pdf [file Supp_Table2.pdf]

SUPPLEMENTARY TABLE S2. ANTIBODIES  
FOR FLOW CYTOMETRY

| <i>Antibody</i>   | <i>Clone</i> | <i>Manufacturer</i> |
|-------------------|--------------|---------------------|
| anti-CD90         | 53-2.1       | BD Bioscience       |
| anti-NK1.1        | PK136        | BD Bioscience       |
| Anti B220         | RA3-6B2      | BD Bioscience       |
| anti-CD49b        | DX5          | BD Bioscience       |
| anti-Ly-6G        | IA8          | BD Bioscience       |
| anti-TER-119      | TER-119      | BD Bioscience       |
| anti-CD11b        | M1/70        | BD Bioscience       |
| anti-Ly-6C        | AL-21        | BD Bioscience       |
| anti-F4/80        | C1:A3-1      | BioLegend           |
| anti-CD115        | AFS98        | eBioscience         |
| anti-CD11c        | HL3          | BD Bioscience       |
| anti-MPO          | 8F4          | Hycult              |
| anti-TNF          | MP6-XT22     | BD Bioscience       |
| anti-TGF- $\beta$ | TW7-16B4     | BioLegend           |
