# Supplementary material
Source: PubMed Central journal article supplement (PMC4677570)
Supplement: Supp_Table3.pdf [file Supp_Table3.pdf]

SUPPLEMENTARY TABLE S3. PRIMERS  
FOR REAL TIME-POLYMERASE CHAIN REACTION

| <i>Target</i>                  | <i>TaqMan ID</i> |
|--------------------------------|------------------|
| <i>MPO</i>                     | Mm01298424_m1    |
| <i>CXCL1</i>                   | Mm04207460_m1    |
| <i>CXCL2</i>                   | Mm00436450_m1    |
| <i>COL1A1</i>                  | Mm00801666_g1    |
| <i>TNF</i>                     | Mm00443260_g1    |
| <i>NF-<math>\kappa</math>B</i> | Mm00481872_s1    |
| <i>TIMP-1</i>                  | Mm00441818_m1    |
| <i>IL-1<math>\beta</math></i>  | Mm00434228_m1    |
| <i>IL-10</i>                   | Mm00439614_m1    |
| <i><math>\alpha</math>-SMA</i> | Mm00725412_s1    |
| <i>18s rRNA</i>                | Hs99999901_s1    |
